# Supplementary material for: Asynchronies during invasive mechanical ventilation: narrative review and update
Source: PubMed Central journal article supplement — Acute Crit Care. 2022 Nov 30;37(4):491–501. doi: 10.4266/acc.2022.01158 (PMC9732206; doi:10.4266/acc.2022.01158), 2022-11-30
Supplement: acc-2022-01158-suppl.pdf [file acc-2022-01158-suppl.pdf]

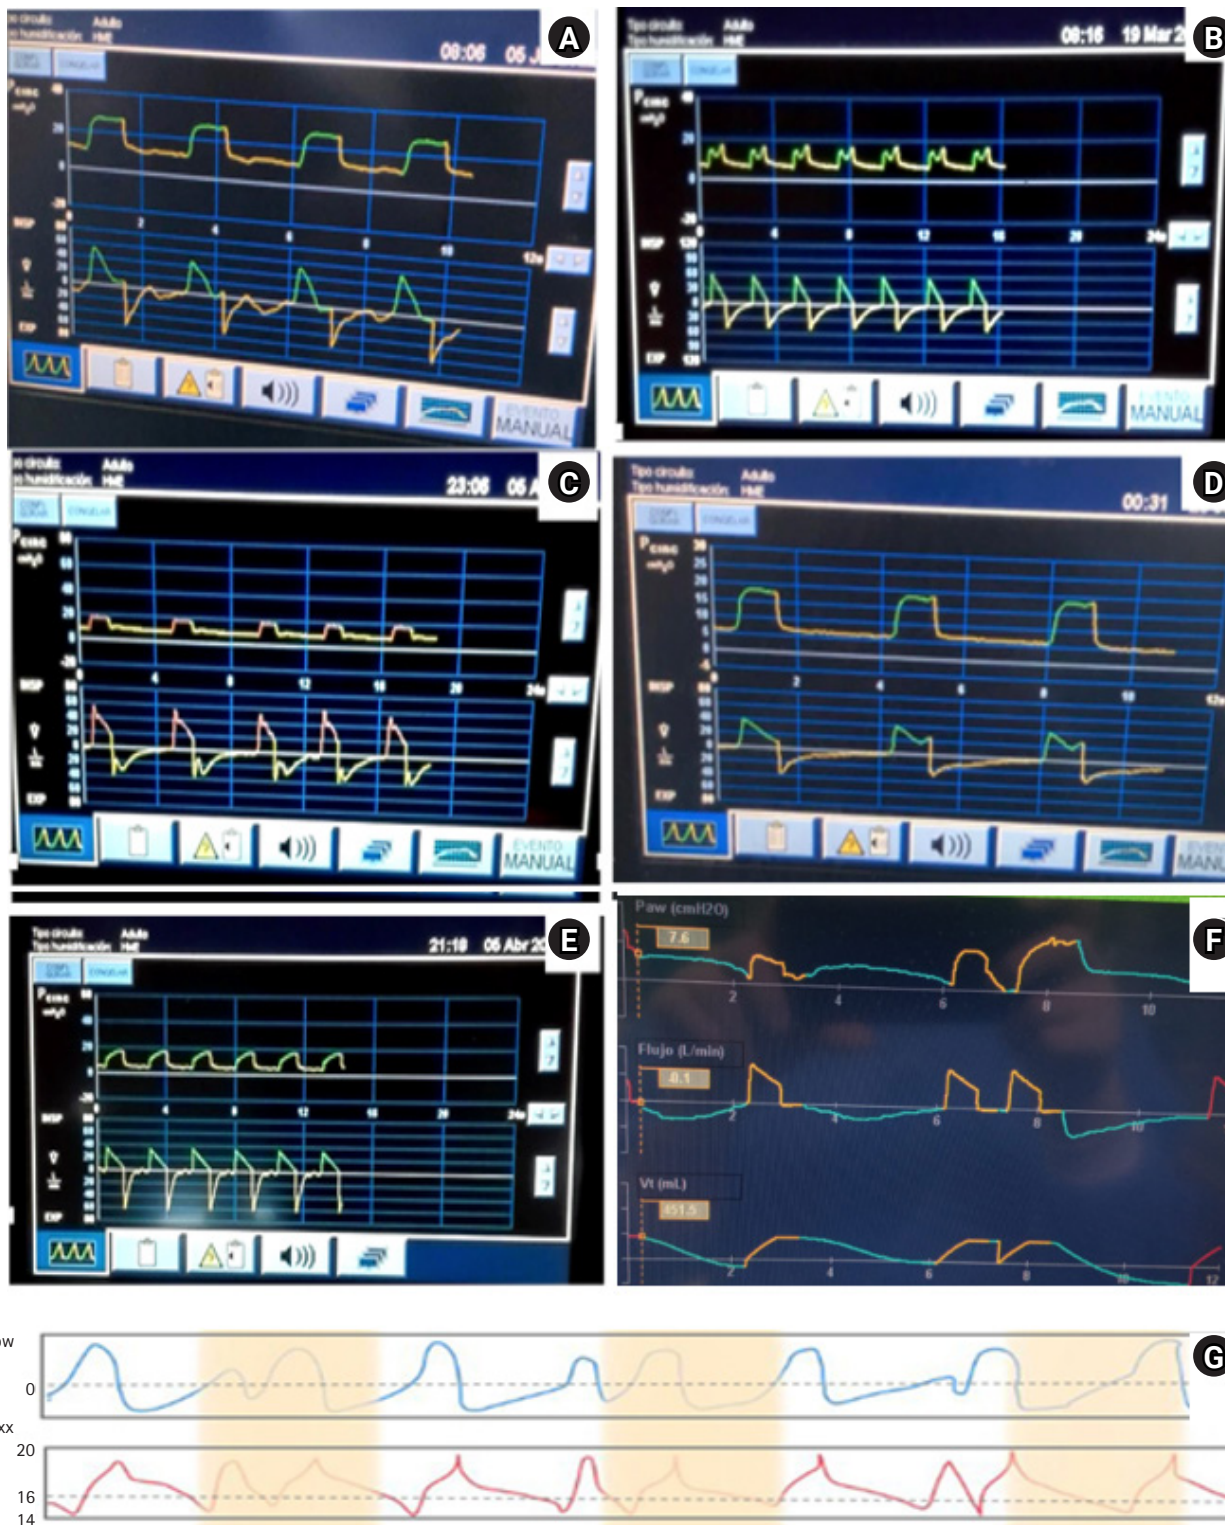

**Supplementary Figure 1.** Different types of asynchronies. (A) Ineffective trigger. (B) Insufficient flow. (C) Premature cycling. (D) Delay cycling. (E) AutoTrigger. (F) Double trigger. (G) Expiratory muscle relaxation-induced triggering.
